# Supplementary material for: Contrasting diversity and community composition of leaf- and root-associated bacterial communities from 13 tree species in a subtropical forest
Source: Research Square preprint supplement (doi:10.21203/rs.3.rs-1467214/v2), 2022-09-27
Supplement: Supplementary file 1 [file fea769770e60e14bbceff0b9.docx]

# *Title page*:

**Contrasting diversity and community composition of leaf- and root-associated bacterial communities from 13 tree species in a subtropical forest**

Hao Yang1, Yong Zheng1*, Zhijie Yang1,2, Quan-Cheng Wang1, Peng-Peng Lü3, Hang-Wei Hu1, Yusheng Yang1,2, Ji-Zheng He1,2

1 Key Laboratory for Humid Subtropical Eco-geographical Processes of the Ministry of Education, Fujian Normal University, Fuzhou 350007, China.

2 Sanming Forest Ecosystem National Observation and Research Station, Sanming 365002, China.

3 Lushan Botanical Garden, Chinese Academy of Sciences, Jiujiang 332900, China.

*Author for correspondence:

Yong Zheng

School of Geographical Sciences, Fujian Normal University, Fuzhou 350007, China

*Tel.*: +86 (0)591 8346 5214; *Fax*: +86 (0)591 8346 5397

*E-mail*: zhengy@fjnu.edu.cn

**Running title:** Tree compartments shape bacterial community composition

# Supplementary Information

# Figure legends

**Figure S1.** The distribution of bacterial phyla among total dataset and three sub-datasets of leaf, root, and soil habitats.

**Figure S2.** Rarefaction curves for the observed bacterial OTUs among the 13 tree species (**A**, with sample numbers) and among three habitats (**B**, with read/sequence numbers), and within leaf **(C)**, root **(D)**, and soil **(E)** sub-datasets in a subtropical forest. Plant species names: CCam, *Cinnamomum camphora*; CCar, *Castanopsis carlesii*; CL, *Cunninghamia lanceolate*; ED, *Elaeocarpus decipiens*; KB, *Koelreuteria bipinnata*; LCh, *Liriodendron chinense*; LCo, *Lindera communis*; LF, *Liquidambar formosana*; MM, *Michelia macclurei*; PM, *Pinus massoniana*; PS, *Photinia serrulate*; SM, *Sapindus mukorossi*; SS, *Schima superba*.

**Figure S3.** The bacterial Shannon-Wiener index comparison among 13 tree species for three habitats of leaf **(A)**, root **(B)**, and soil **(C)**. Plant species names: CCam, *Cinnamomum camphora*; CCar, *Castanopsis carlesii*; CL, *Cunninghamia lanceolate*; ED, *Elaeocarpus decipiens*; KB, *Koelreuteria bipinnata*; LCh, *Liriodendron chinense*; LCo, *Lindera communis*; LF, *Liquidambar formosana*; MM, *Michelia macclurei*; PM, *Pinus massoniana*; PS, *Photinia serrulate*; SM, *Sapindus mukorossi*; SS, *Schima superba*.

**Figure S4.** The bacterial Simpson’s index comparison among 13 tree species for three habitats of leaf **(A)**, root **(B)**, and soil **(C)**. Plant species names: CCam, *Cinnamomum camphora*; CCar, *Castanopsis carlesii*; CL, *Cunninghamia lanceolate*; ED, *Elaeocarpus decipiens*; KB, *Koelreuteria bipinnata*; LCh, *Liriodendron chinense*; LCo, *Lindera communis*; LF, *Liquidambar formosana*; MM, *Michelia macclurei*; PM, *Pinus massoniana*; PS, *Photinia serrulate*; SM, *Sapindus mukorossi*; SS, *Schima superba*.

**Figure S5.** The bacterial Pielou’s evenness index comparison among 13 tree species for three habitats of leaf **(A)**, root **(B)**, and soil **(C)**. Plant species names: CCam, *Cinnamomum camphora*; CCar, *Castanopsis carlesii*; CL, *Cunninghamia lanceolate*; ED, *Elaeocarpus decipiens*; KB, *Koelreuteria bipinnata*; LCh, *Liriodendron chinense*; LCo, *Lindera communis*; LF, *Liquidambar formosana*; MM, *Michelia macclurei*; PM, *Pinus massoniana*; PS, *Photinia serrulate*; SM, *Sapindus mukorossi*; SS, *Schima superba*.

# Fig. S1

**
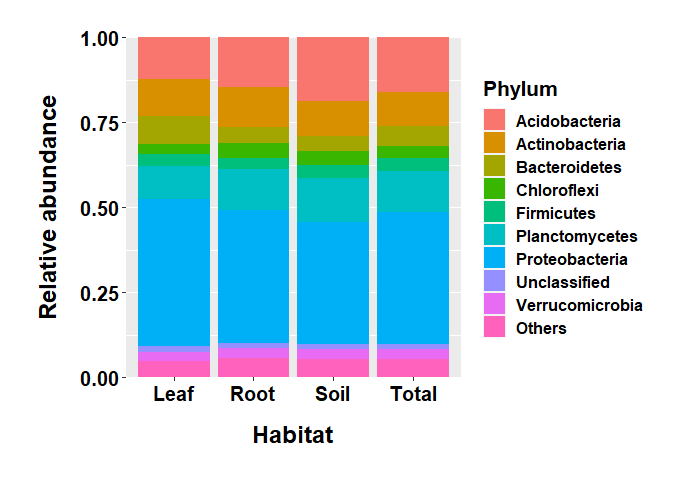
**

**Figure S1.** The distribution of bacterial phyla among total dataset and three sub-datasets of leaf, root, and soil habitats.

# Fig. S2


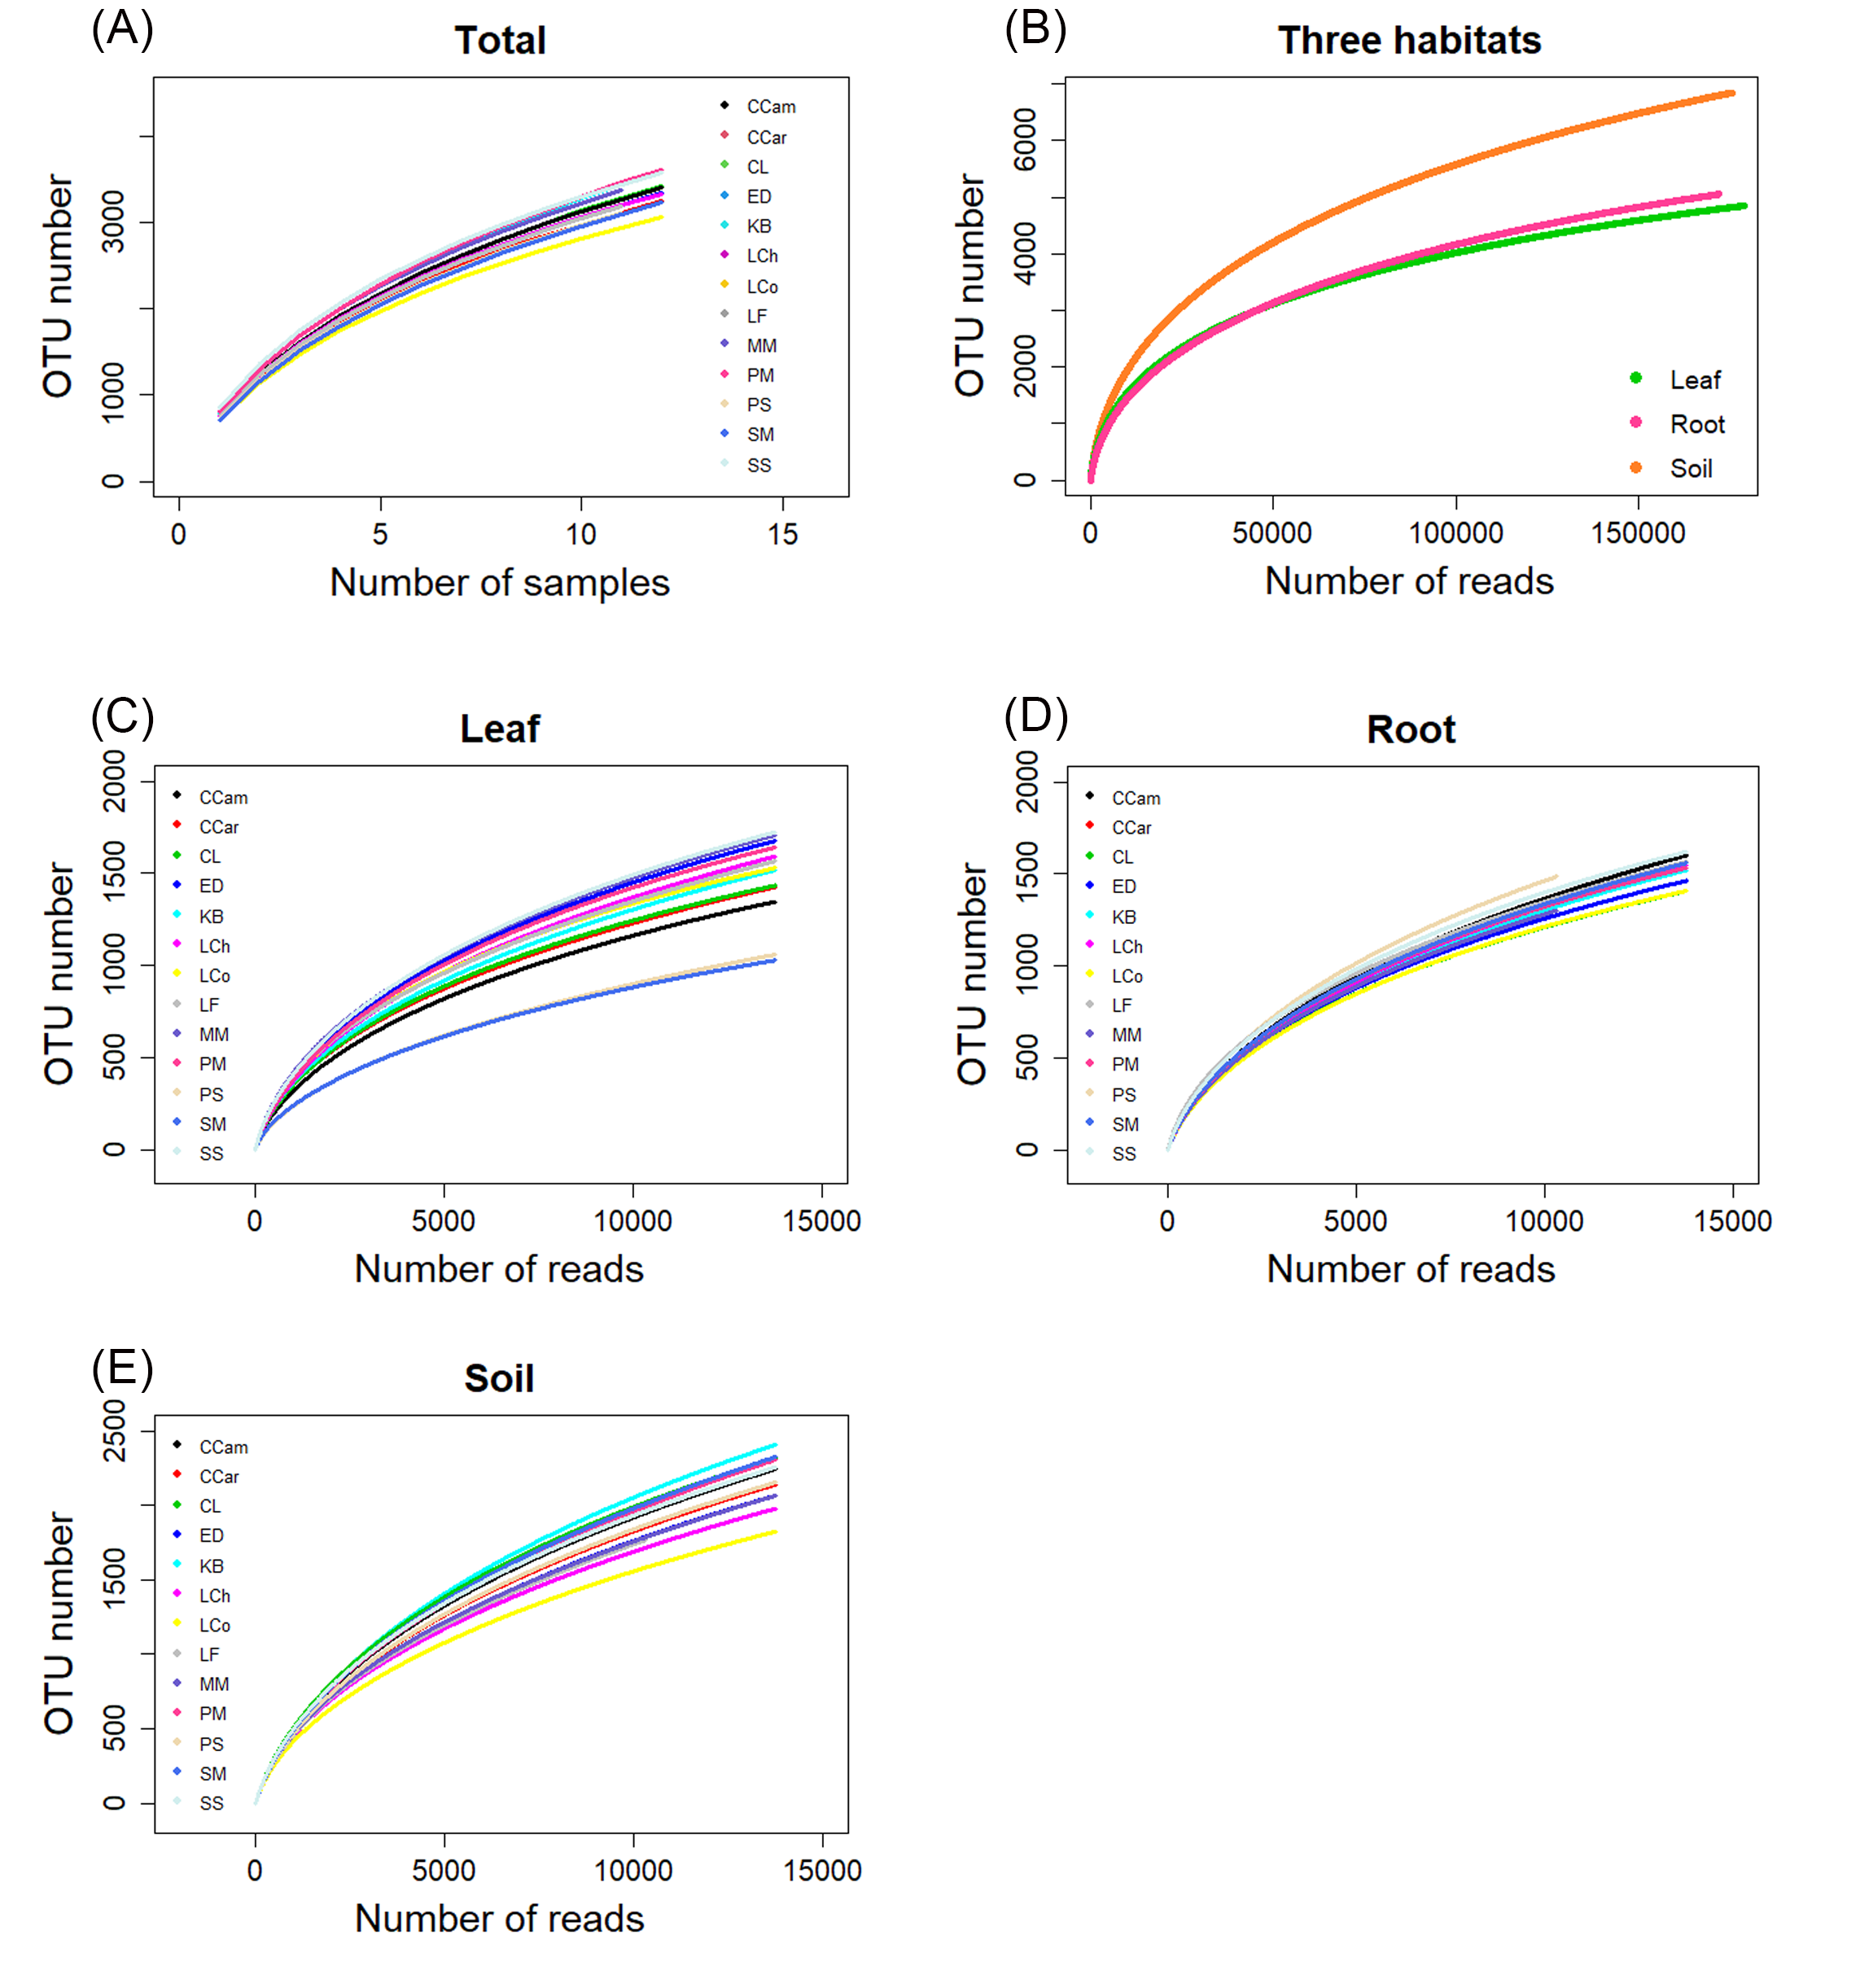


**Figure S2.** Rarefaction curves for the observed bacterial OTUs among the 13 tree species (**A**, with sample numbers) and among three habitats (**B**, with read/sequence numbers), and within leaf **(C)**, root **(D)**, and soil **(E)** sub-datasets in a subtropical forest. Plant species names: CCam, *Cinnamomum camphora*; CCar, *Castanopsis carlesii*; CL, *Cunninghamia lanceolate*; ED, *Elaeocarpus decipiens*; KB, *Koelreuteria bipinnata*; LCh, *Liriodendron chinense*; LCo, *Lindera communis*; LF, *Liquidambar formosana*; MM, *Michelia macclurei*; PM, *Pinus massoniana*; PS, *Photinia serrulate*; SM, *Sapindus mukorossi*; SS, *Schima superba*.

# Fig. S3


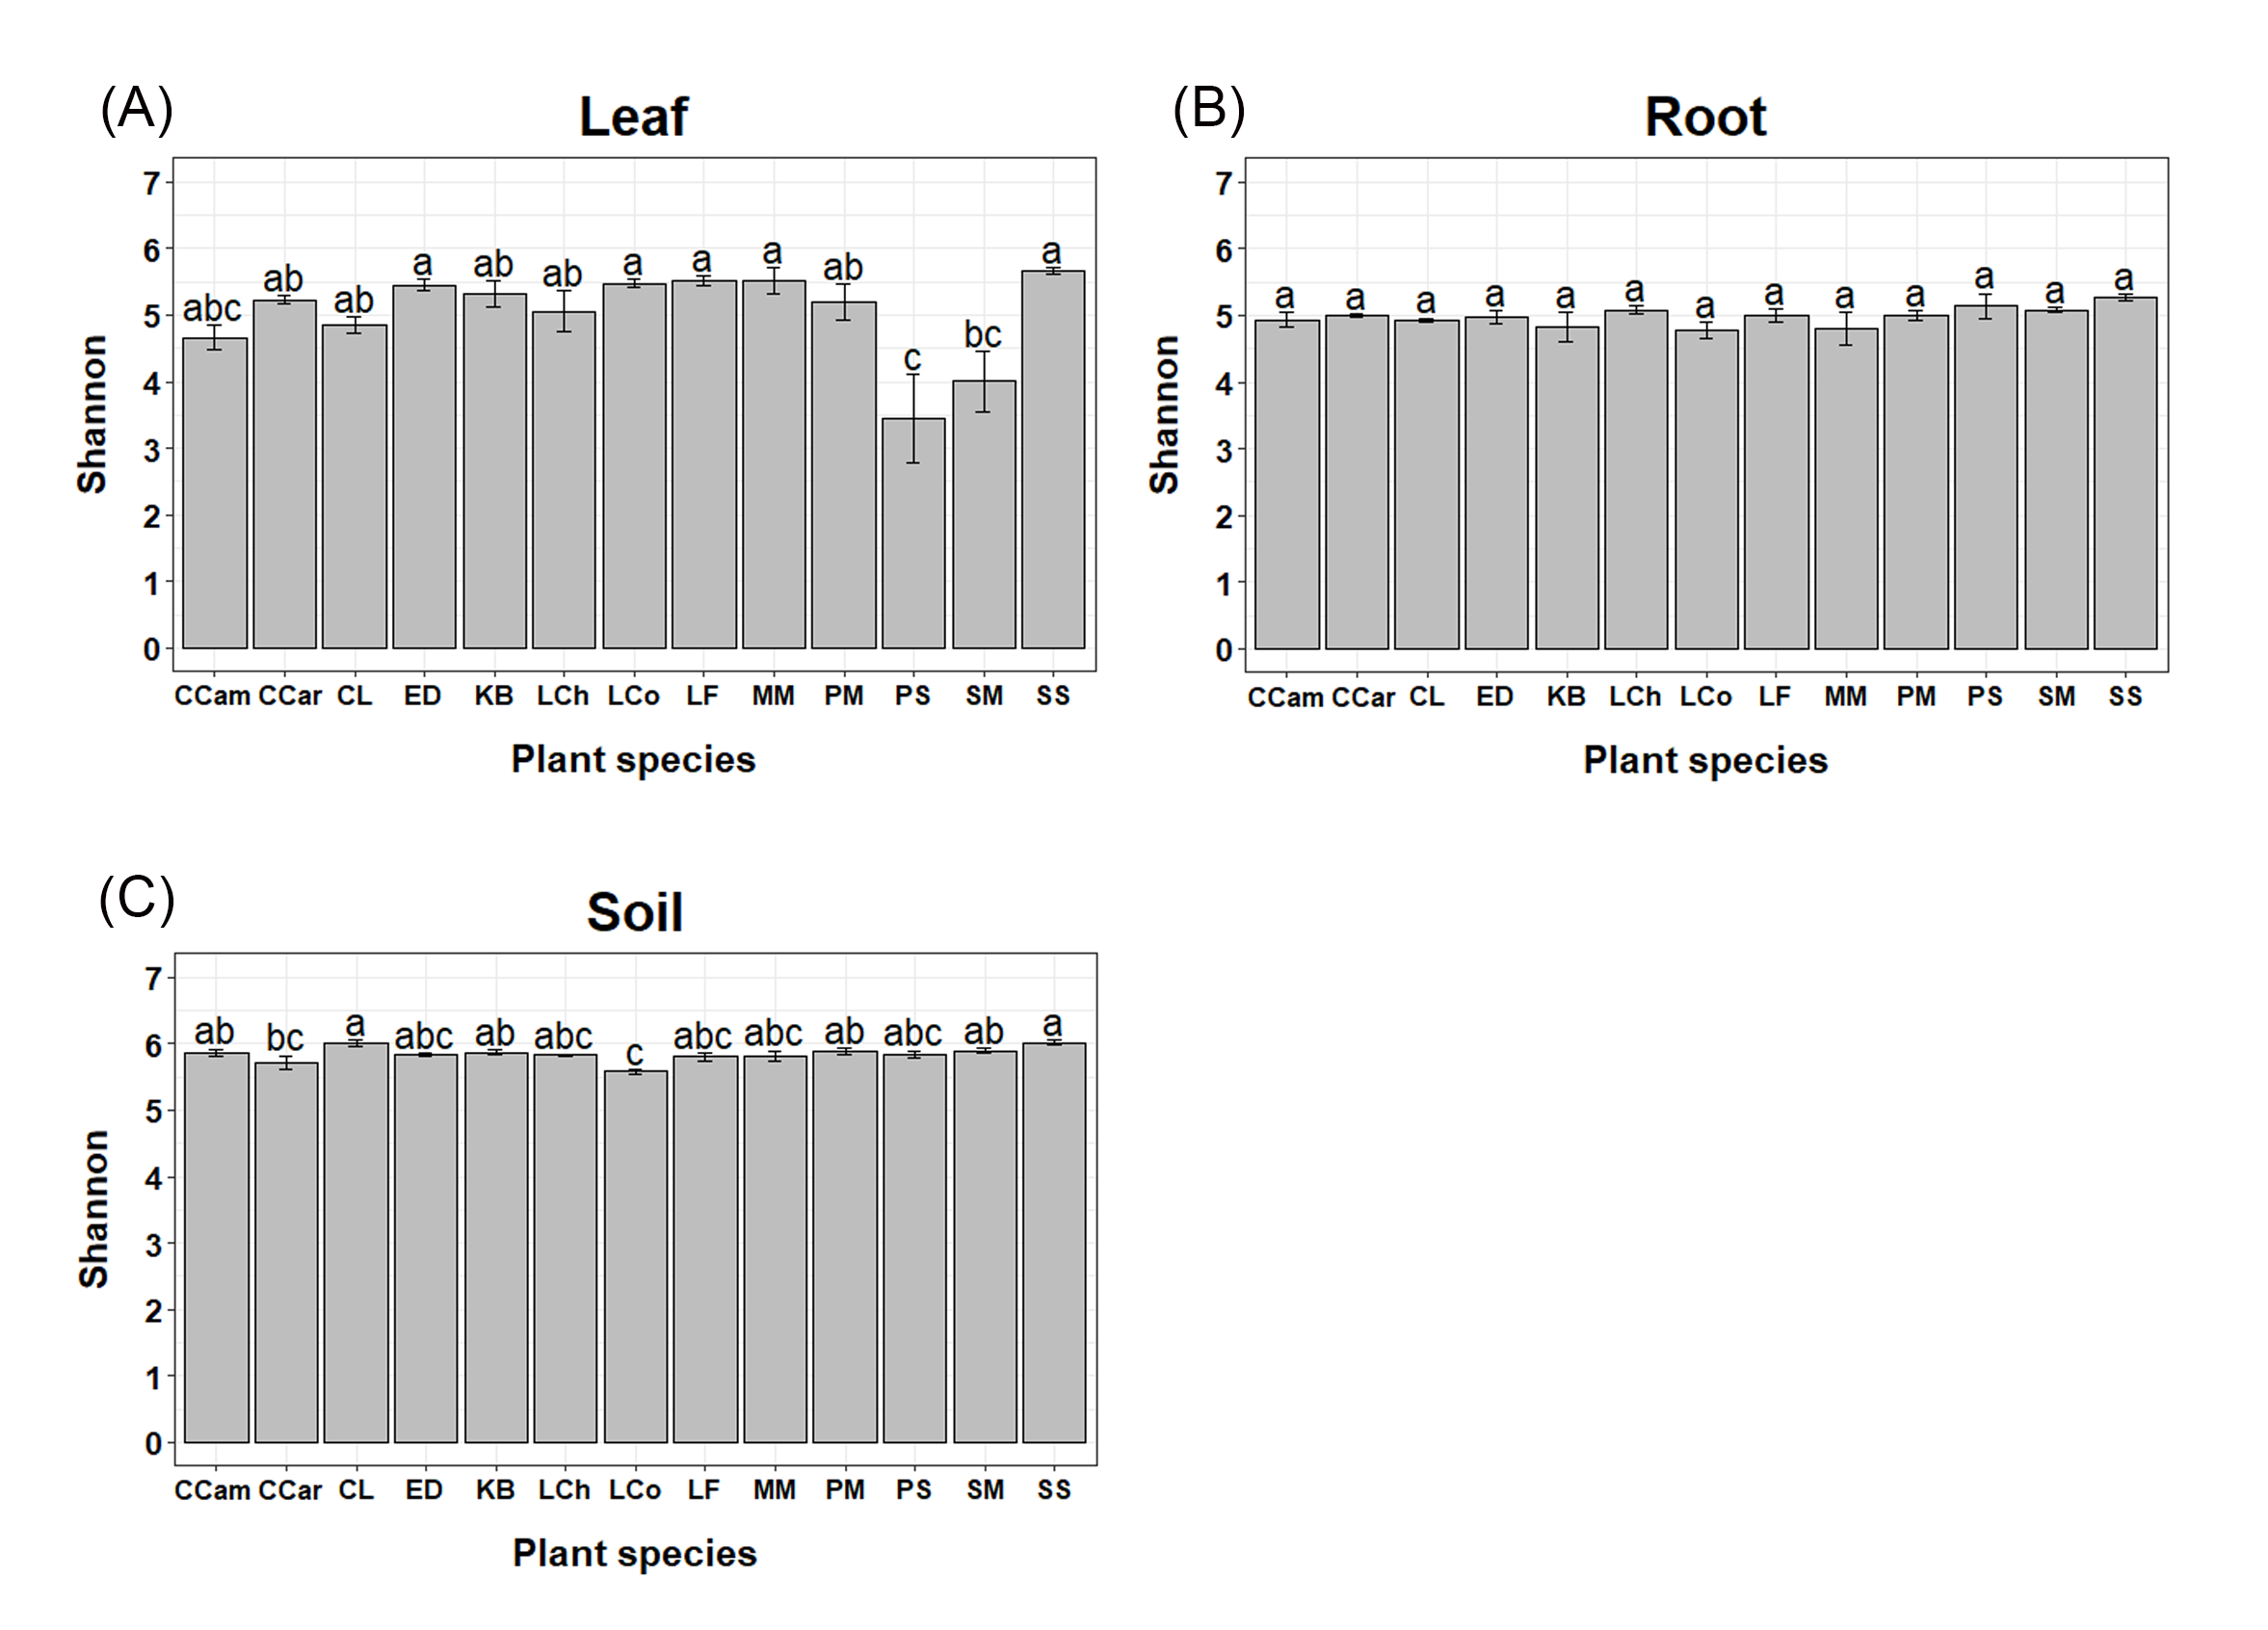


**Figure S3.** The bacterial Shannon-Wiener index comparison among 13 tree species for three habitats of leaf **(A)**, root **(B)**, and soil **(C)**. Plant species names: CCam, *Cinnamomum camphora*; CCar, *Castanopsis carlesii*; CL, *Cunninghamia lanceolate*; ED, *Elaeocarpus decipiens*; KB, *Koelreuteria bipinnata*; LCh, *Liriodendron chinense*; LCo, *Lindera communis*; LF, *Liquidambar formosana*; MM, *Michelia macclurei*; PM, *Pinus massoniana*; PS, *Photinia serrulate*; SM, *Sapindus mukorossi*; SS, *Schima superba*.

# Fig. S4


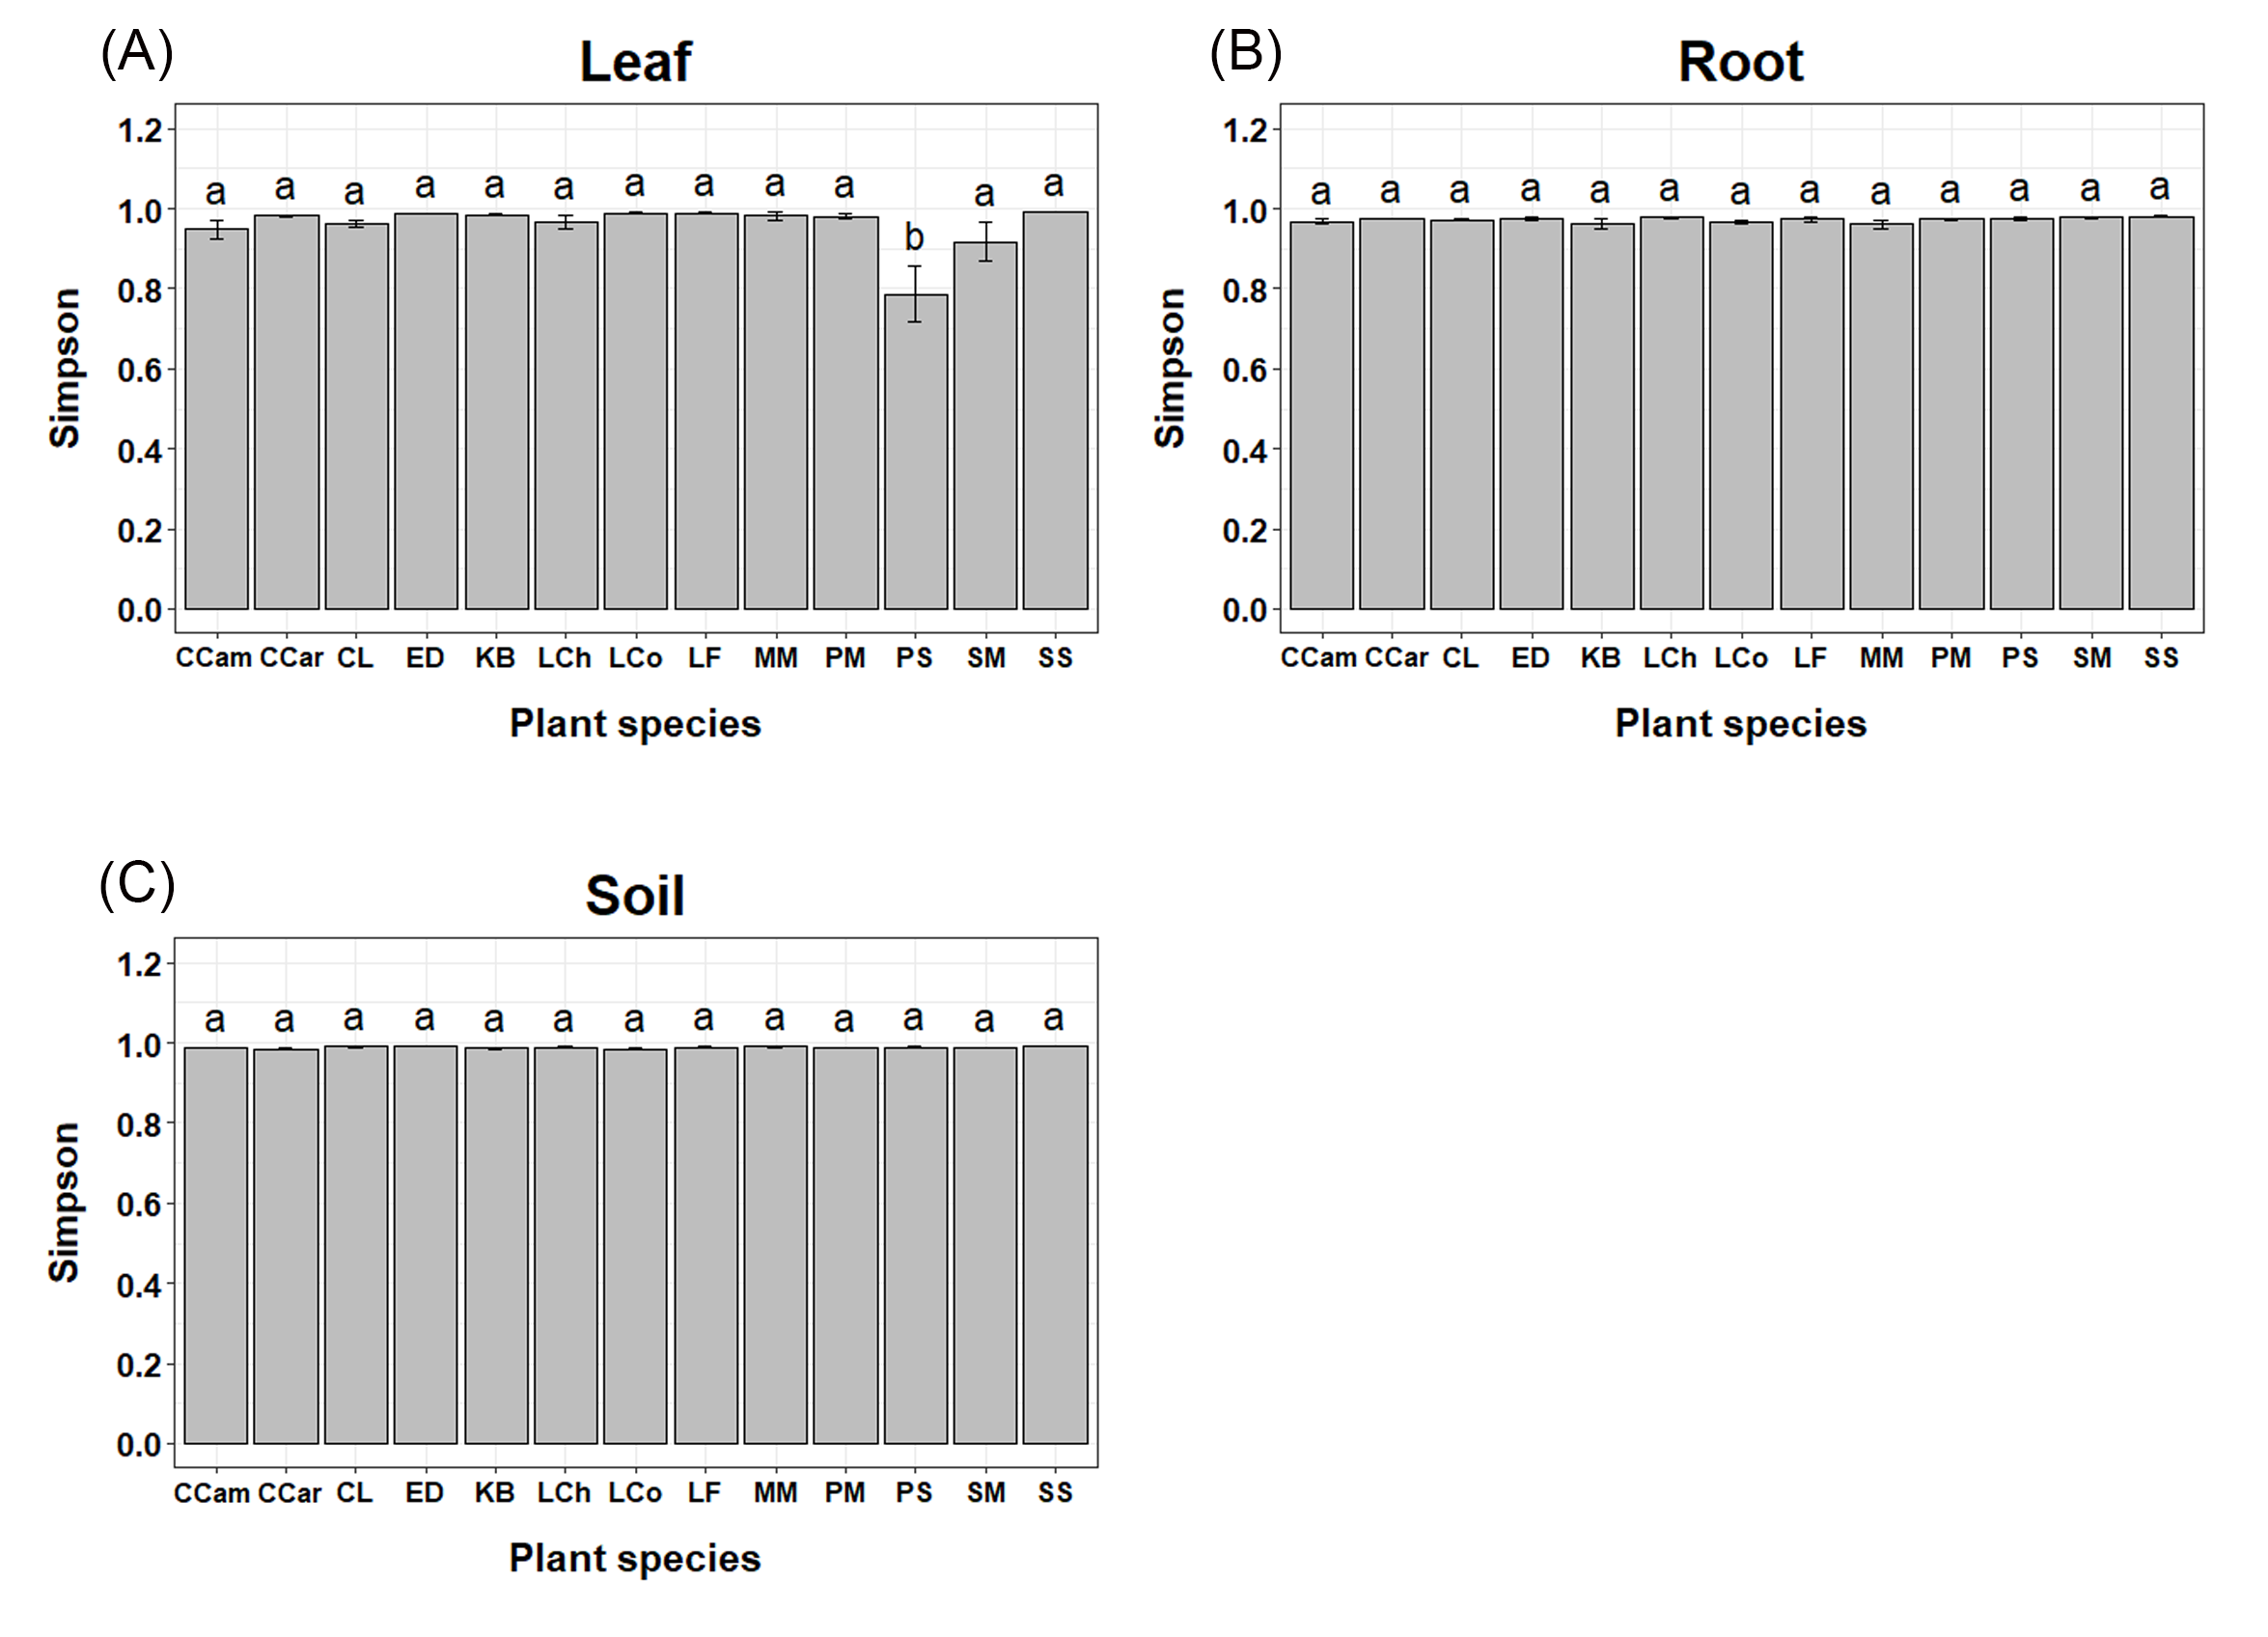


**Figure S4.** The bacterial Simpson’s index comparison among 13 tree species for three habitats of leaf **(A)**, root **(B)**, and soil **(C)**. Plant species names: CCam, *Cinnamomum camphora*; CCar, *Castanopsis carlesii*; CL, *Cunninghamia lanceolate*; ED, *Elaeocarpus decipiens*; KB, *Koelreuteria bipinnata*; LCh, *Liriodendron chinense*; LCo, *Lindera communis*; LF, *Liquidambar formosana*; MM, *Michelia macclurei*; PM, *Pinus massoniana*; PS, *Photinia serrulate*; SM, *Sapindus mukorossi*; SS, *Schima superba*.

# Fig. S5


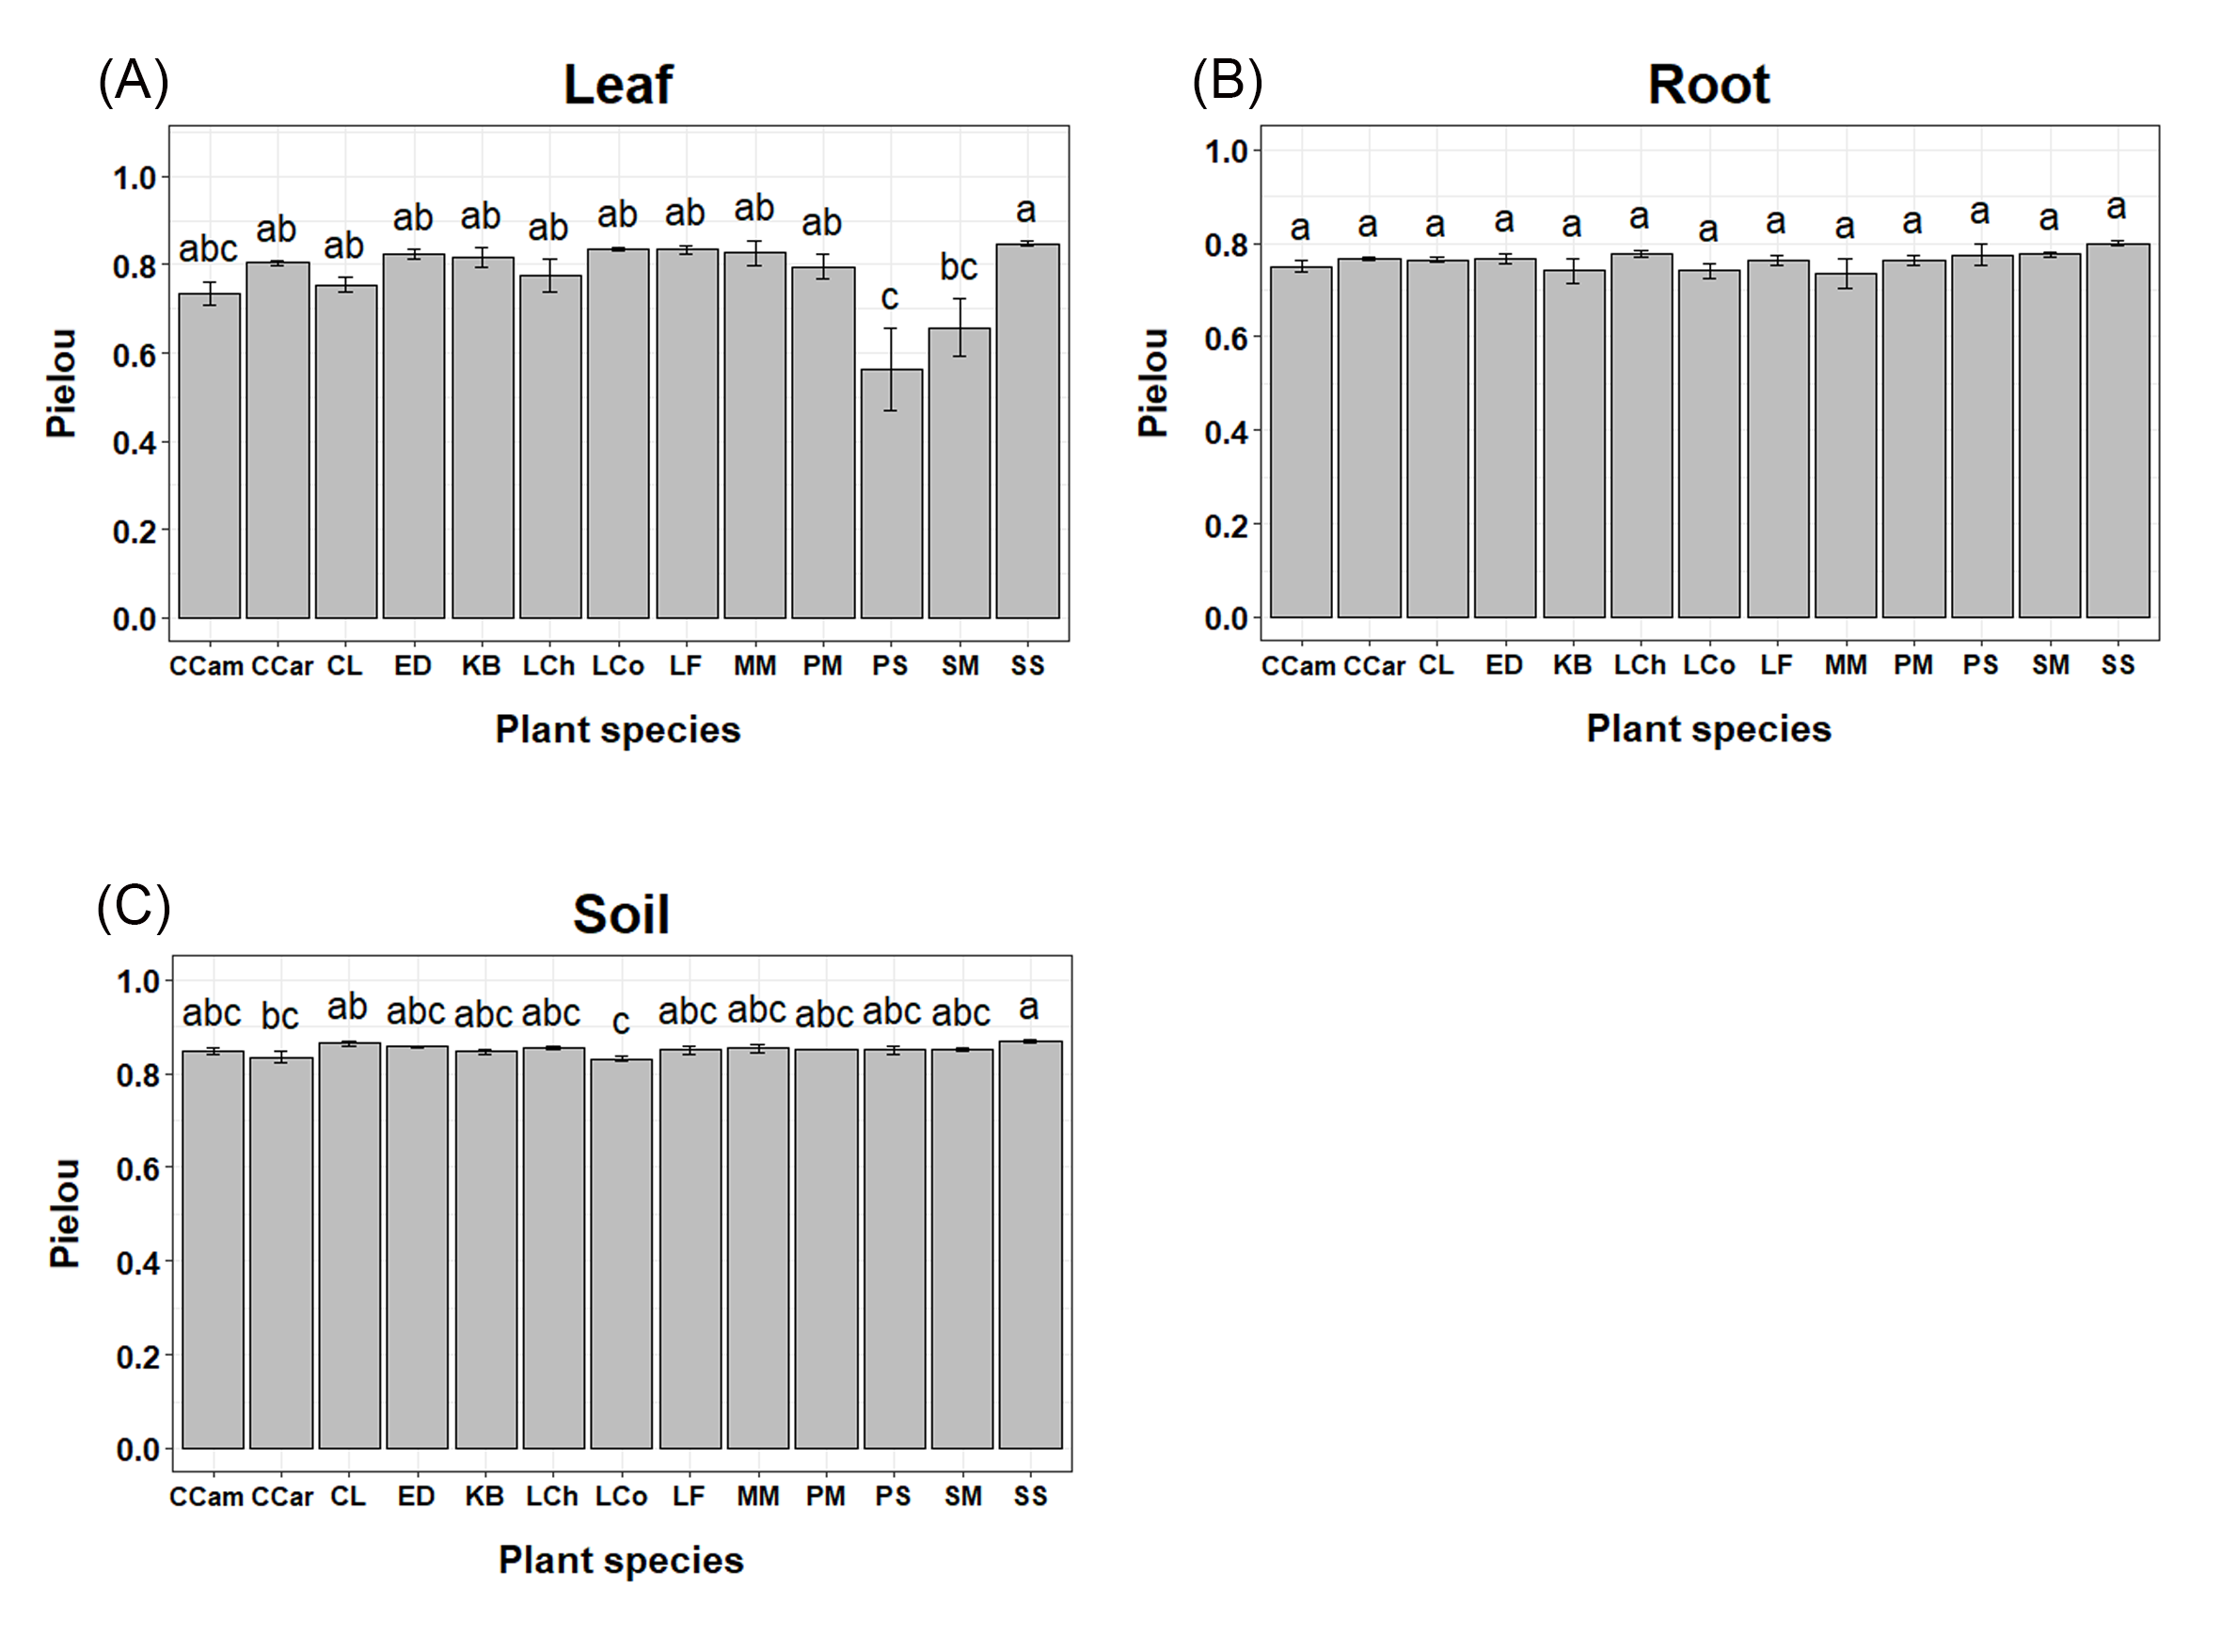


**Figure S5.** The bacterial Pielou’s evenness index comparison among 13 tree species for three habitats of leaf **(A)**, root **(B)**, and soil **(C)**. Plant species names: CCam, *Cinnamomum camphora*; CCar, *Castanopsis carlesii*; CL, *Cunninghamia lanceolate*; ED, *Elaeocarpus decipiens*; KB, *Koelreuteria bipinnata*; LCh, *Liriodendron chinense*; LCo, *Lindera communis*; LF, *Liquidambar formosana*; MM, *Michelia macclurei*; PM, *Pinus massoniana*; PS, *Photinia serrulate*; SM, *Sapindus mukorossi*; SS, *Schima superba*.

# Table S1.

Results of one-way ANOVA analyses for the alpha-diversities (richness, Shannon-Wiener and Simpson's indices, and Pielou's evenness) based on the whole, leaf, root, and soil datasets, respectively.

| **Dataset** | **Df** | **Richness** | |  | **Shannon** | |  | **Simpson** | |  | **Pielou** | |
| --- | --- | --- | --- | --- | --- | --- | --- | --- | --- | --- | --- | --- |
|  |  | *F* value | *P* value |  | *F* value | *P* value |  | *F* value | *P* value |  | *F* value | *P* value |
| Total data (habitat effect) | 2 | 150.3 | < 0.0001 |  | 49.92 | < 0.0001 |  | 190.8 | < 0.0001 |  | 29.38 | < 0.0001 |
| Leaf | 12 | 6.535 | < 0.0001 |  | 5.736 | < 0.0001 |  | 4.869 | < 0.0001 |  | 5.069 | < 0.0001 |
| Root | 12 | 1.401 | 0.209 |  | 1.407 | 0.206 |  | 1.301 | 0.259 |  | 1.574 | 0.142 |
| Soil | 12 | 4.651 | < 0.001 |  | 4.431 | < 0.001 |  | 1.544 | 0.151 |  | 2.405 | 0.020 |

# Table S2.

Summary of the PerMANOVA and beta dispersion analyses for the bacterial community compositions based on whole, leaf, root, and soil datasets, respectively.

| Dataset (Effect origin) | PerMANOVA | |  |  | Beta dispersion analysis | | |
| --- | --- | --- | --- | --- | --- | --- | --- |
|  | Df | *R*2 | *P* value |  | Df | *F* value | *P* value |
| Total data (habitat effect) | 2 | 0.447 | 0.001 |  | 3 | 80.385 | < 0.0001 |
| Leaf | 12 | 0.432 | 0.001 |  | 12 | 7.430 | < 0.0001 |
| Root | 12 | 0.386 | 0.001 |  | 12 | 0.983 | 0.482 |
| Soil | 12 | 0.281 | 0.002 |  | 12 | 1.526 | 0.157 |
